# Supplementary material
Source: Royal Society of Chemistry journal article supplement (doi:10.1039/d5fo04706d)
Supplement: d5fo04706d2.pdf [file d5fo04706d2.pdf]

**Supplementary Table 1-** The effect of High-Protein vs Low-Protein Diets on pooled findings from the random-effects model and several subgroups.

|                                                                |            | No. of Treatment arms | WMD <sup>1</sup> (95%CI) |        |       | Heterogeneity      |                          |
|----------------------------------------------------------------|------------|-----------------------|--------------------------|--------|-------|--------------------|--------------------------|
|                                                                |            |                       |                          |        |       | I <sup>2</sup> (%) | Pvalue for Heterogeneity |
| <b>AST (U/L)</b>                                               |            |                       |                          |        |       |                    |                          |
| <b>Duration</b>                                                | ≤ 12 weeks | 9                     | -2.4                     | -5.10  | 1.01  | 57.4               | 0.016                    |
|                                                                | > 12 weeks | 3                     | -2.10                    | -8.16  | 3.96  | 81.9               | 0.004                    |
| <b>Percentage of protein intake from total calories intake</b> | <30 %      | 7                     | -3.27                    | -6.57  | 0.04  | 63.9               | 0.011                    |
|                                                                | ≥30 %      | 5                     | -0.58                    | -4.34  | 3.18  | 51.8               | 0.081                    |
| <b>ALT (U/L)</b>                                               |            |                       |                          |        |       |                    |                          |
| <b>Duration</b>                                                | ≤ 12 weeks | 10                    | -6.08                    | -11.07 | -1.10 | 75.0               | <0.001                   |
|                                                                | > 12 weeks | 4                     | -4.00                    | -9.24  | 1.25  | 81.2               | 0.001                    |
| <b>Percentage of protein intake from total calories intake</b> | <30 %      | 7                     | -7.63                    | -13.34 | -1.93 | 84.7               | <0.001                   |
|                                                                | ≥30 %      | 7                     | -2.86                    | -6.52  | 0.80  | 40.8               | 0.119                    |
| <b>GGT (U/L)</b>                                               |            |                       |                          |        |       |                    |                          |
| <b>Duration</b>                                                | ≤ 12 weeks | 6                     | -9.48                    | -16.48 | -2.49 | 72.9               | 0.002                    |
|                                                                | > 12 weeks | 2                     | -2.57                    | -7.65  | 2.50  | 0.0                | 0.819                    |
| <b>Percentage of protein intake from total calories intake</b> | <30 %      | 4                     | -9.74                    | -20.39 | 0.92  | 77.2               | 0.004                    |
|                                                                | ≥30 %      | 4                     | -5.62                    | -13.13 | 1.90  | 72.8               | 0.012                    |
| <b>TNF-α (pg/mL)</b>                                           |            |                       |                          |        |       |                    |                          |
| <b>Percentage of protein intake from total calories intake</b> | <30 %      | 2                     | -0.69                    | -1.46  | 0.08  | 0.0                | 0.658                    |
|                                                                | ≥30 %      | 5                     | -1.28                    | -3.13  | 0.56  | 99.8               | <0.001                   |
| <b>IL-6 (pg/mL)</b>                                            |            |                       |                          |        |       |                    |                          |
| <b>Percentage of protein intake from total calories intake</b> | <30 %      | 3                     | -1.27                    | -2.38  | -0.15 | 46.2               | 0.156                    |
|                                                                | ≥30 %      | 4                     | 0.22                     | -0.02  | 0.46  | 42.8               | 0.155                    |
| <b>CRP (mg/l)</b>                                              |            |                       |                          |        |       |                    |                          |

|                                                                |                 |    |                          |             |                  |
|----------------------------------------------------------------|-----------------|----|--------------------------|-------------|------------------|
| <b>Duration</b>                                                | $\leq 12$ weeks | 16 | <b>-0.20 -0.67 0.28</b>  | <b>93.8</b> | <b>&lt;0.001</b> |
|                                                                | $> 12$ weeks    | 14 | <b>-0.84 -1.97 0.29</b>  | <b>98.1</b> | <b>&lt;0.001</b> |
| <b>Percentage of protein intake from total calories intake</b> | $<30$ %         | 15 | <b>-0.30 -1.10 0.50</b>  | <b>97.9</b> | <b>&lt;0.001</b> |
|                                                                | $\geq 30$ %     | 15 | <b>-0.75 -1.23 -0.27</b> | <b>87.4</b> | <b>&lt;0.001</b> |
| <b>Age of participants</b>                                     | $<50$ years     | 19 | <b>-0.59 -1.38 0.19</b>  | <b>97.9</b> | <b>&lt;0.001</b> |
|                                                                | $\geq 50$ years | 11 | <b>-0.35 -0.78 0.07</b>  | <b>79.4</b> | <b>&lt;0.001</b> |

**Abbreviations:** TNF- $\alpha$ : Tumour Necrosis Factor alpha; IL-6, Interleukin 6; GGT, Gamma-glutamyl transferase; AST, Aspartate aminotransferase; ALT, Alanine aminotransferase
