# Supplementary material
Source: Royal Society of Chemistry journal article supplement (doi:10.1039/d5fo04706d)
Supplement: d5fo04706d3.pdf [file d5fo04706d3.pdf]

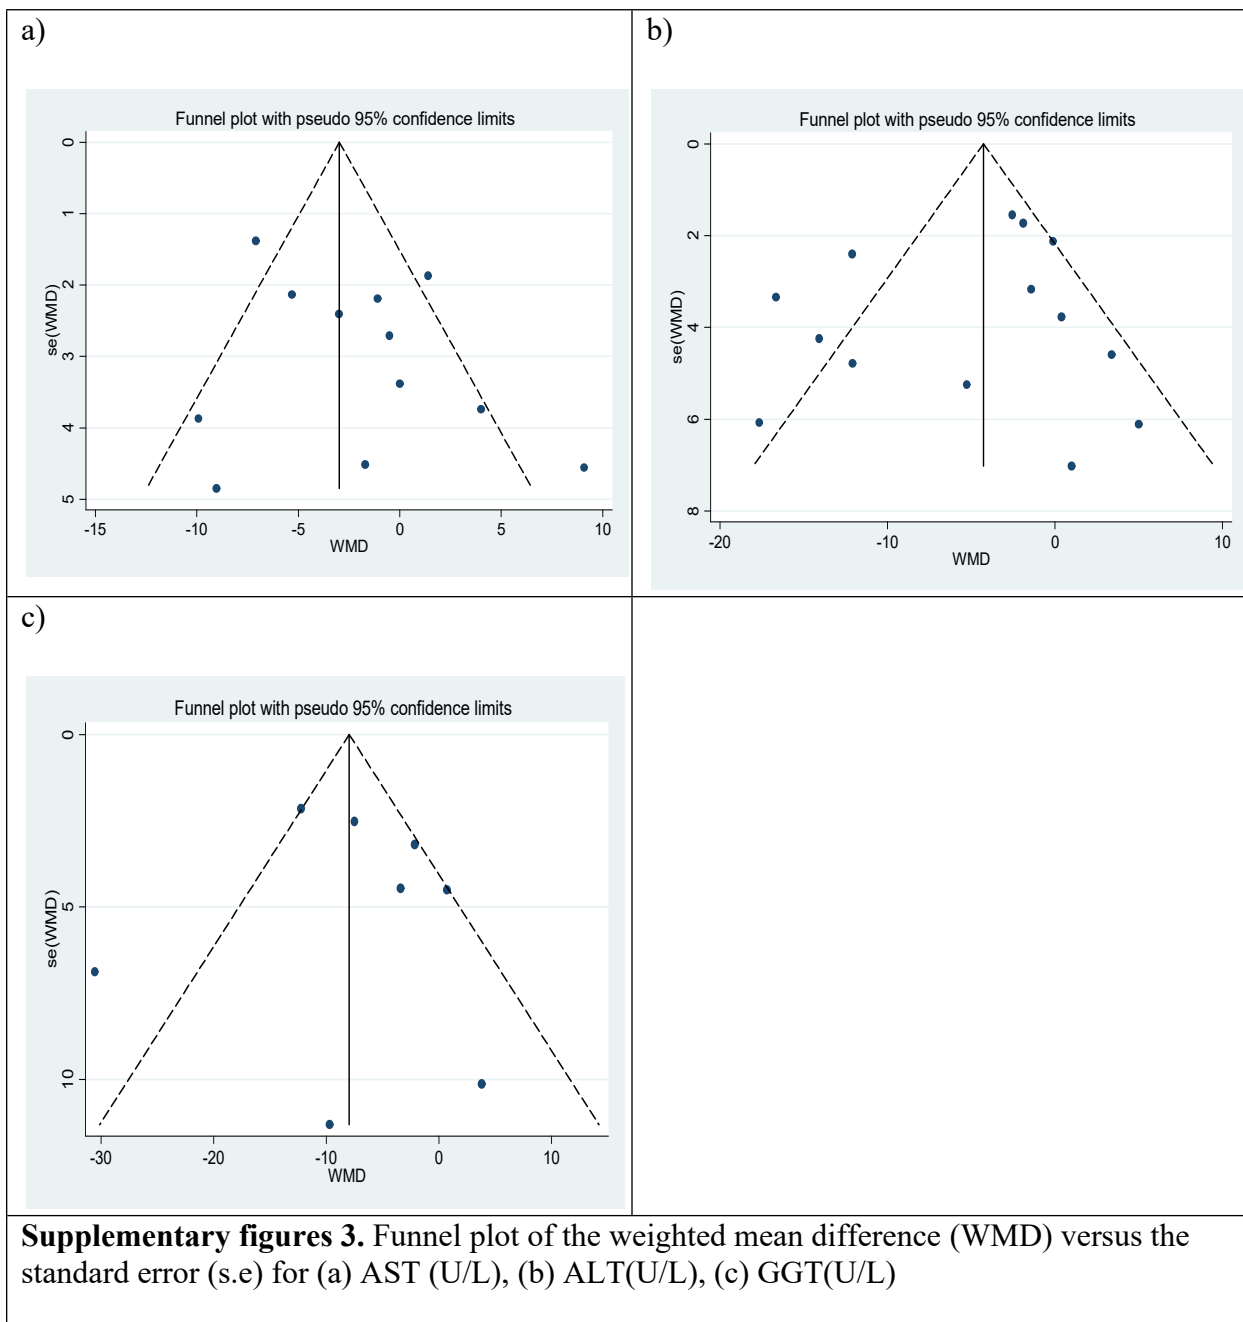

a)

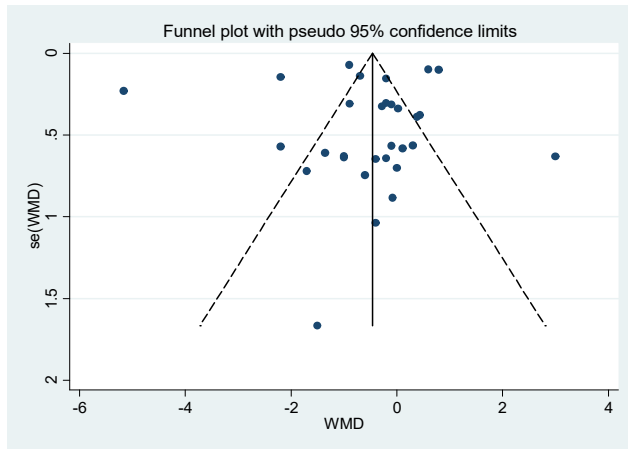

b)

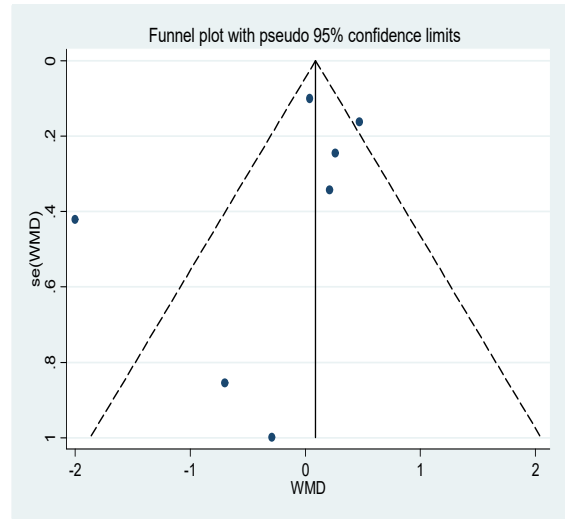

c)

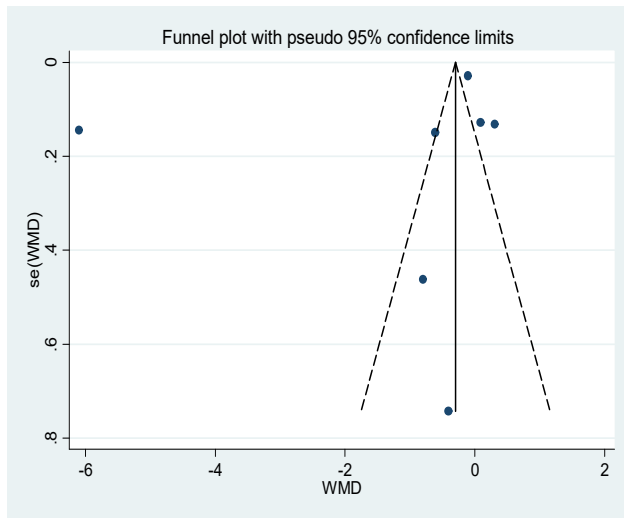

**Supplementary figures 4.** Funnel plot of the weighted mean difference (WMD) versus the standard error (s.e) for (a) CRP (mg/L), (b) IL-6 (pg/mL), (c) TNF- $\alpha$ (pg/mL)
