# Supplementary material
Source: Royal Society of Chemistry journal article supplement (doi:10.1039/d5fo04706d)
Supplement: d5fo04706d4.pdf [file d5fo04706d4.pdf]

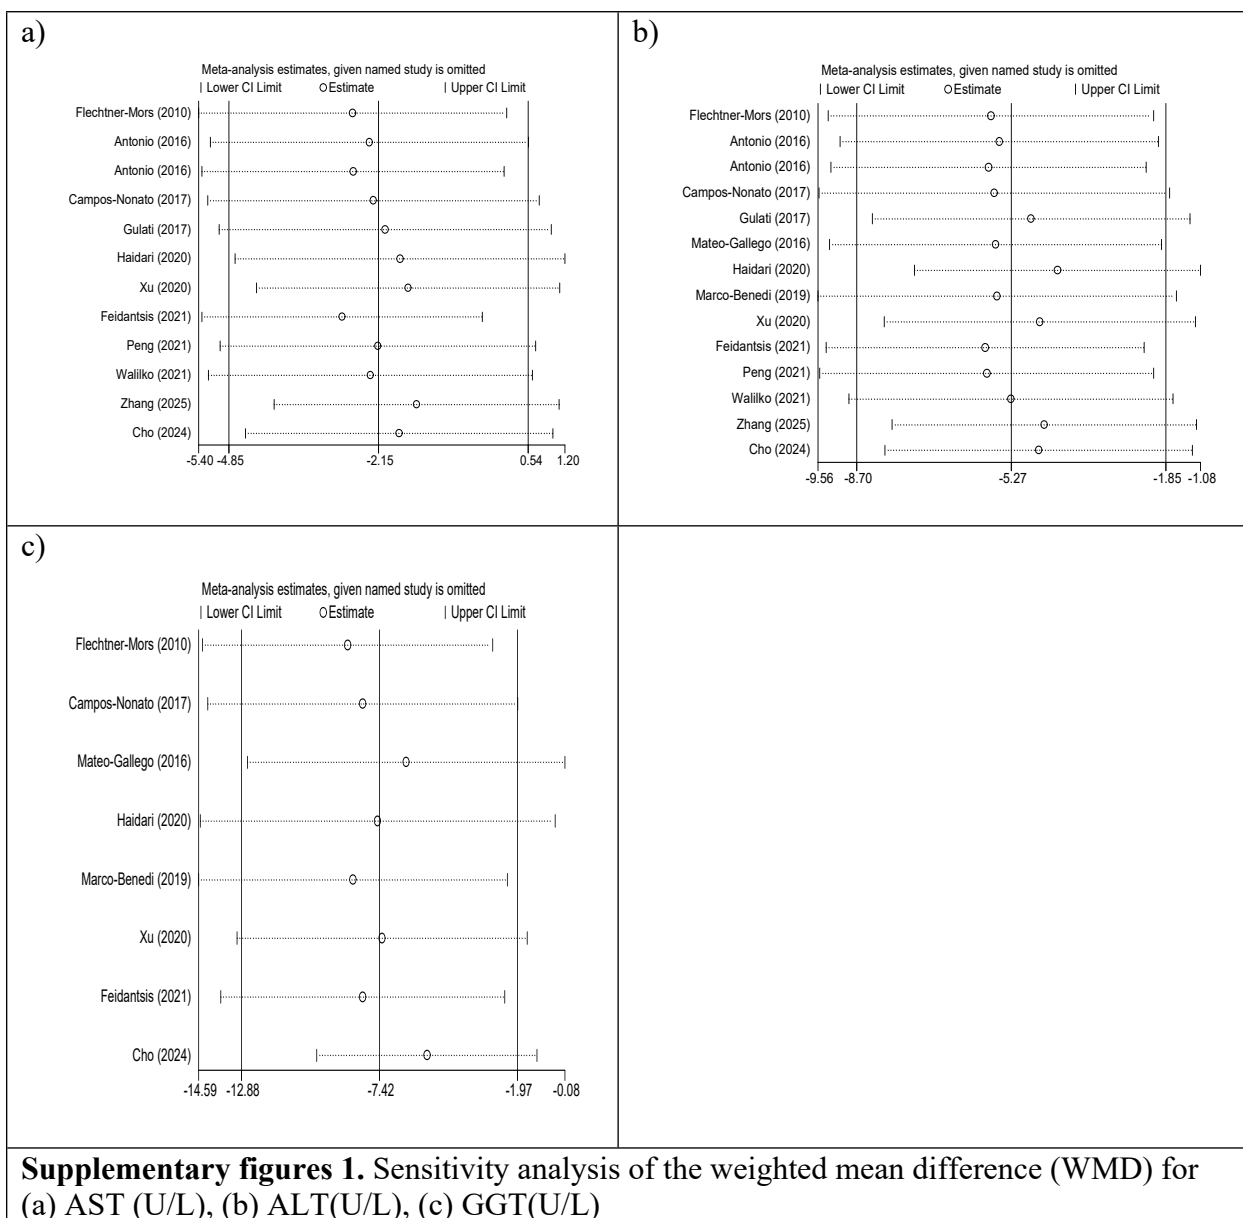

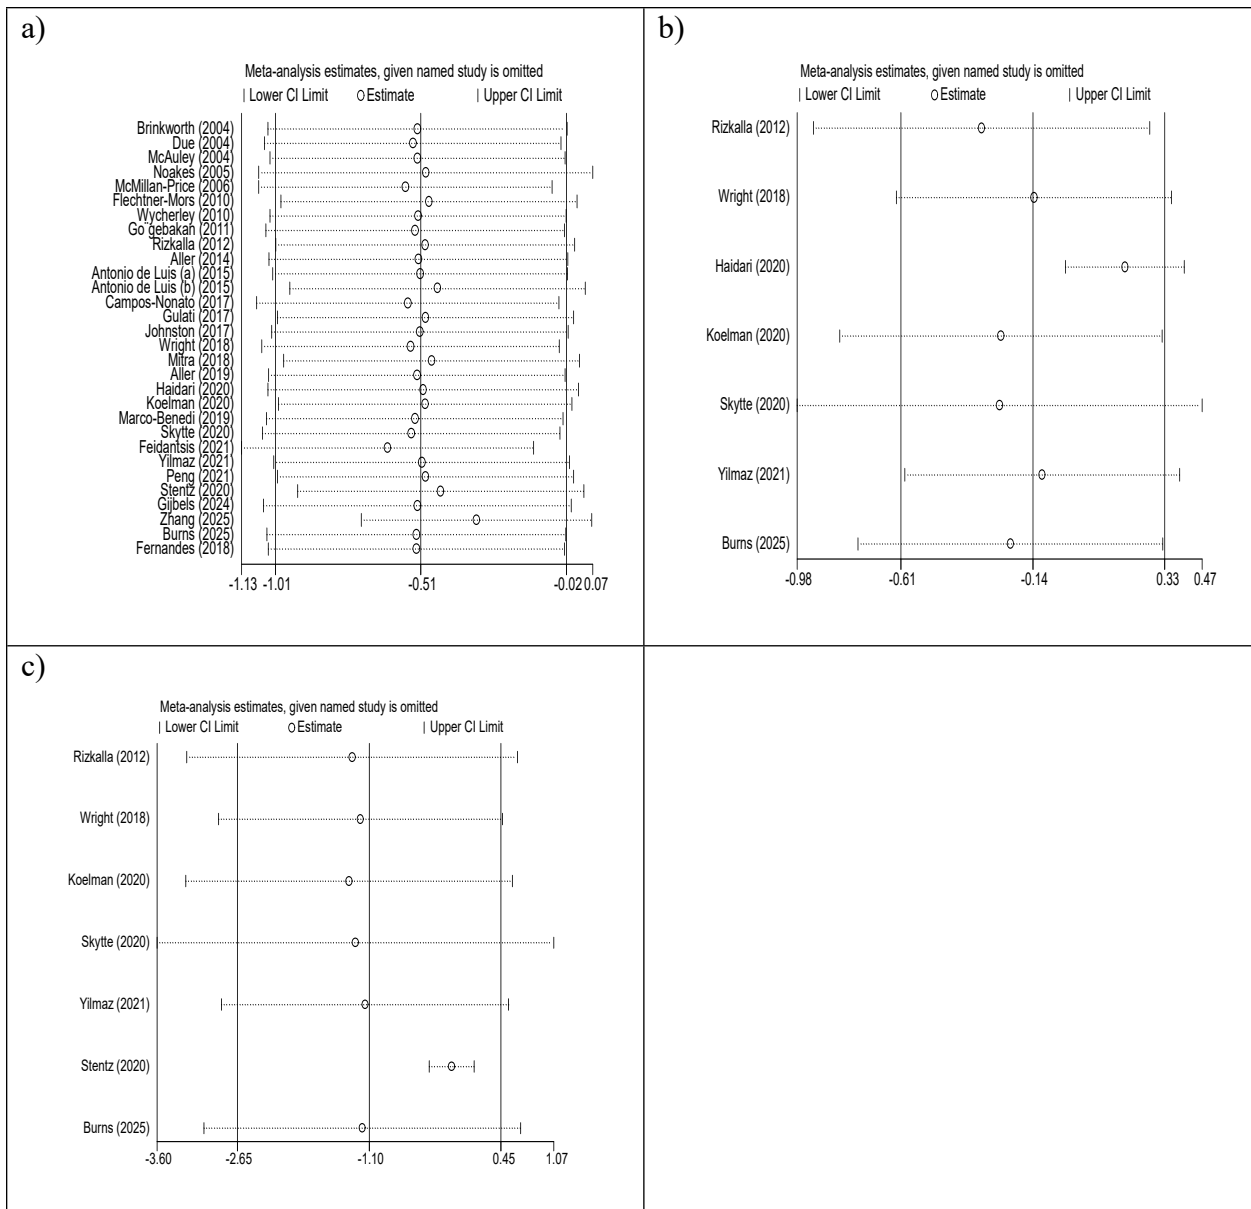

**Supplementary figures 2.** Sensitivity analysis of the weighted mean difference (WMD) for (a) CRP (mg/L), (b) IL-6 (pg/mL), (c) TNF- $\alpha$ (pg/mL)
